# Supplementary material for: Differential Cav2.1 and Cav2.3 channel inhibition by baclofen and α-conotoxin Vc1.1 via GABAB receptor activation
Source: PubMed Central journal article supplement — J Gen Physiol. 2014 Apr;143(4):465–79. doi: 10.1085/jgp.201311104 (PMC3971658; doi:10.1085/jgp.201311104), 2014-04
Supplement: supp_jgp.201311104_JGP_201311104_sm.pdf [file supp_jgp.201311104_JGP_201311104_sm.pdf]

Berecki et al., <http://www.jgp.org/cgi/content/full/jgp.201311104/DC1>

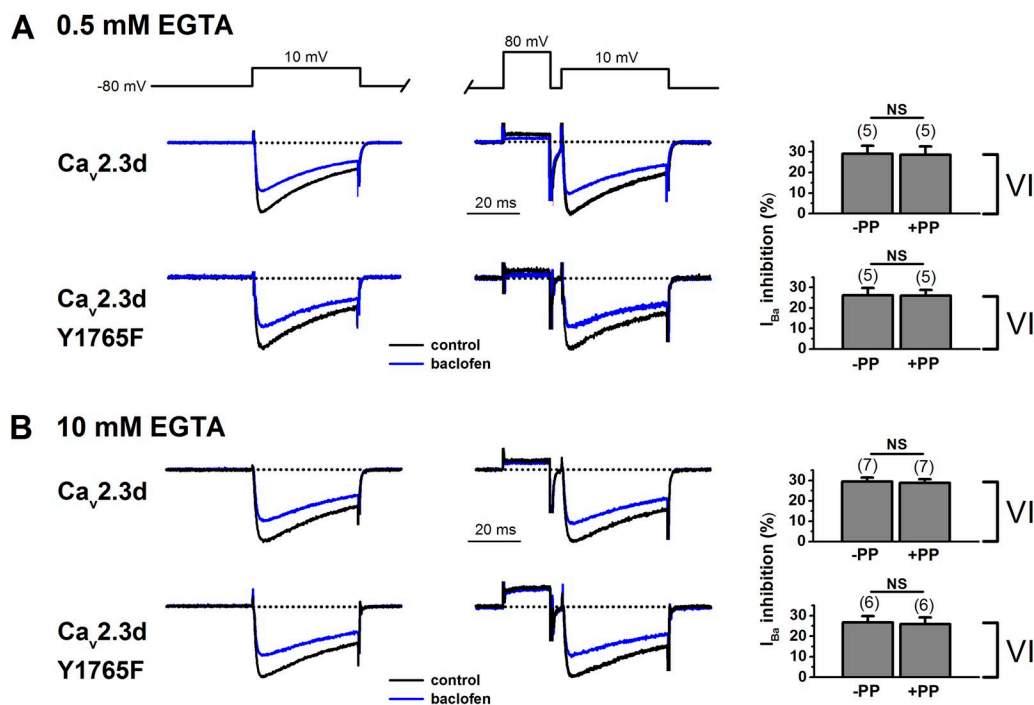

**Figure S1.** Voltage dependence of baclofen inhibition of human  $Ca_v2.3d$  (Y1765F) channel via  $GABA_B$  activation. In HEK cells transiently coexpressing  $Ca_v2.3d$  or  $Ca_v2.3d$  (Y1765F) channels and  $GABA_B$ Rs, EGTA does not affect the voltage dependence of inhibition in the absence or presence of 50  $\mu$ M baclofen. (A and B) Representative  $I_{Ba}$  traces in the absence (control) and presence of baclofen before (left) and after (middle) a depolarizing prepulse to +80 mV (inset protocols), with intracellular solution containing 0.5 or 10 mM EGTA. Currents were normalized to peak  $I_{Ba}$  amplitude obtained with a prepulse in the absence of baclofen; dotted lines represent zero-current level. (Right) Summary of  $I_{Ba}$  inhibition in the absence and presence of a prepulse, -PP and +PP, respectively. Data are mean  $\pm$  SEM; the number of experiments is in parentheses. NS, +PP inhibition not significantly different from -PP inhibition. VI, voltage-independent fraction.

Table S1

Parameters derived from Boltzmann fits to I-V and G-V curves in  $Ca_v2.1/GABA_B$  cells in the presence of 0.5 or 10 mM EGTA in the intracellular recording solution

| EGTA | Condition    | $V_{0.5, act}^a$ | $k^a$         | $V_{0.5, act}^b$ | $k^b$         |
|------|--------------|------------------|---------------|------------------|---------------|
| mM   |              | mV               | mV            | mV               | mV            |
| 0.5  | Control (5)  | $6.50 \pm 0.9$   | $4.4 \pm 0.6$ | $7.68 \pm 0.4$   | $5.0 \pm 0.2$ |
|      | Baclofen (5) | $7.97 \pm 0.8$   | $4.6 \pm 0.3$ | $8.91 \pm 0.3$   | $5.4 \pm 0.1$ |
| 10   | Control (6)  | $6.47 \pm 0.6$   | $4.3 \pm 0.2$ | $6.79 \pm 0.3$   | $4.8 \pm 0.1$ |
|      | Baclofen (6) | $7.67 \pm 0.9$   | $4.4 \pm 0.4$ | $8.37 \pm 0.4$   | $5.1 \pm 0.2$ |

The number of experiments is in parentheses. Values represent mean  $\pm$  SEM.

<sup>a</sup>These parameters were obtained from Boltzmann fits of I-V relations.

<sup>b</sup>These parameters were obtained from Boltzmann fits of G-V relations.
